# Supplementary material for: Acridino-Diaza-20-Crown-6 Ethers: New Macrocyclic Hosts for Optochemical Metal Ion Sensing
Source: MDPI journal article supplement (doi:10.3390/molecules26134043), 2021-07-01

## SUPPLEMENTARY MATERIALS

### **Acridino-diaza-20-crown-6 ethers: new macrocyclic hosts for optochemical metal ion sensing**

**Ádám Golcs,<sup>\*[a]</sup> Korinna Kovács,<sup>[a]</sup> Panna Vezse,<sup>[a]</sup> Tünde Tóth,<sup>[a,b]</sup> Péter Huszthy<sup>[a]</sup>**

[a] Department of Organic Chemistry and Technology, Budapest University of Technology and Economics, Szent Gellért tér 4., H-1111 Budapest, Hungary

[b] Institute for Energy Security and Environmental Safety, Centre for Energy Research, Konkoly-Thege Miklós út 29-33., H-1121 Budapest, Hungary

\*Corresponding author. Tel.: +36 20 622 6164, E-mail address: golcs.adam@edu.bme.hu

#### **Contents**

1. Selectivity studies of macrocycles **12** and **17**
2. Determination of complex stability constants based on spectroscopic titration data
3. <sup>1</sup>H-NMR and <sup>13</sup>C-NMR spectra of the new compounds (solvent: CDCl<sub>3</sub> unless otherwise noted)

## 1. Selectivity studies of macrocycles **12** and **17**

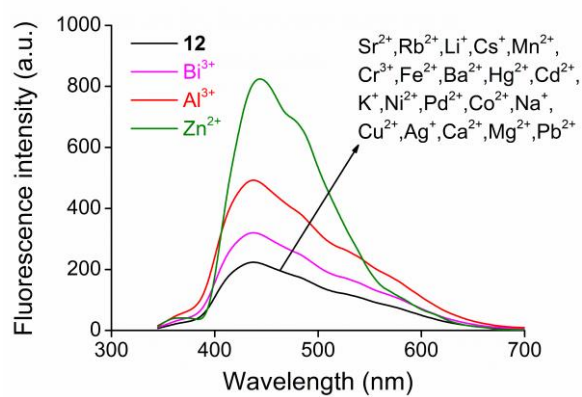

**Figure S1.** Fluorescence turn-on response of macrocycle **12** in the presence of 10 molar equivalents of different metal salts in acetonitrile

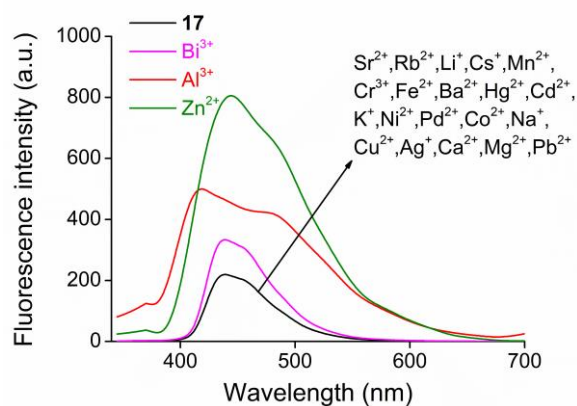

**Figure S2.** Fluorescence turn-on response of macrocycle **17** in the presence of 10 molar equivalents of different metal salts in acetonitrile

## 2. Determination of complex stability constants based on spectroscopic titration data

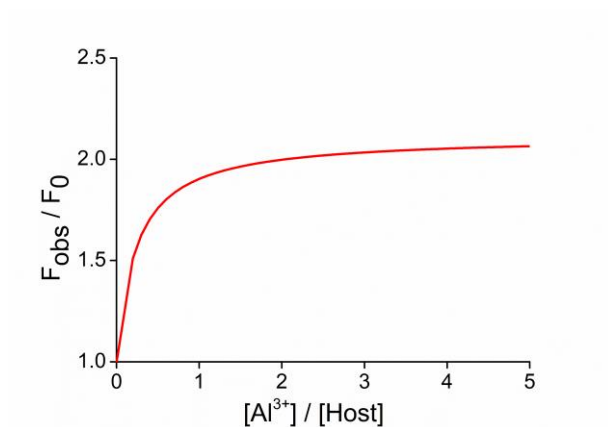

**Figure S3.** The globally fitted nonlinear regression curve for determining  $\log K_a$  based on fluorescence titration data of macrocycle **15** with  $\text{Al}^{3+}$

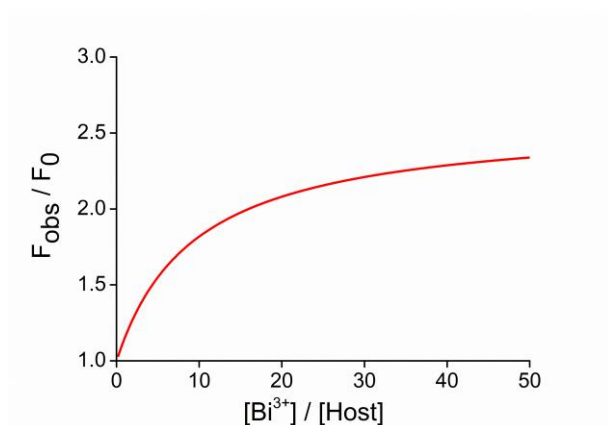

**Figure S4.** The globally fitted nonlinear regression curve for determining  $\log K_a$  based on fluorescence titration data of macrocycle **15** with  $\text{Bi}^{3+}$

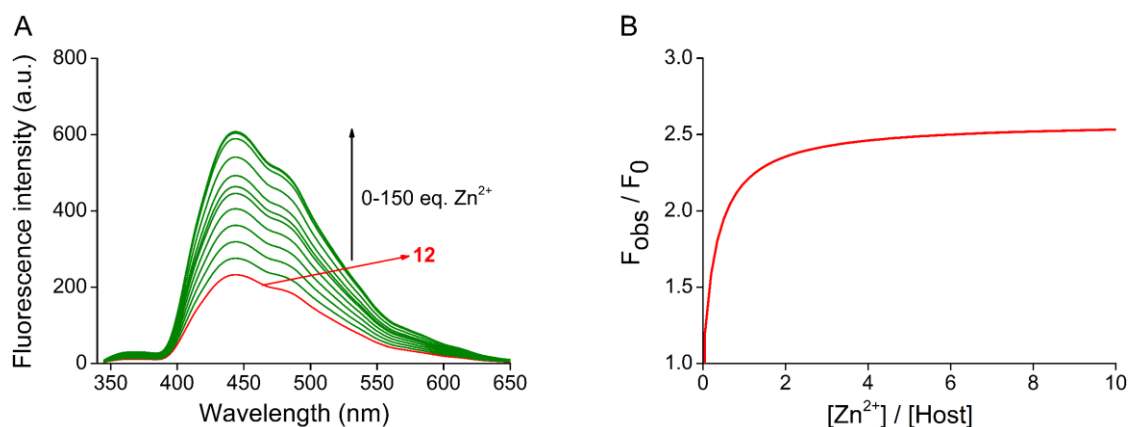

**Figure S5.** Series of fluorescence emission spectra for titration of macrocycle **12** with  $\text{Zn}^{2+}$  in acetonitrile (A) and the globally fitted nonlinear regression curve for determining  $\log K_a$  (B)

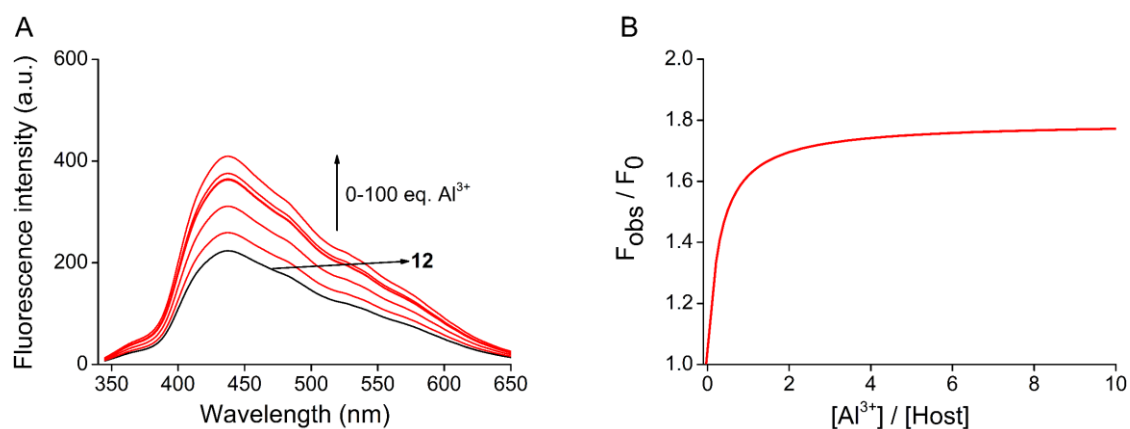

**Figure S6.** Series of fluorescence emission spectra for titration of macrocycle **12** with  $\text{Al}^{3+}$  in acetonitrile (A) and the globally fitted nonlinear regression curve for determining  $\log K_a$  (B)

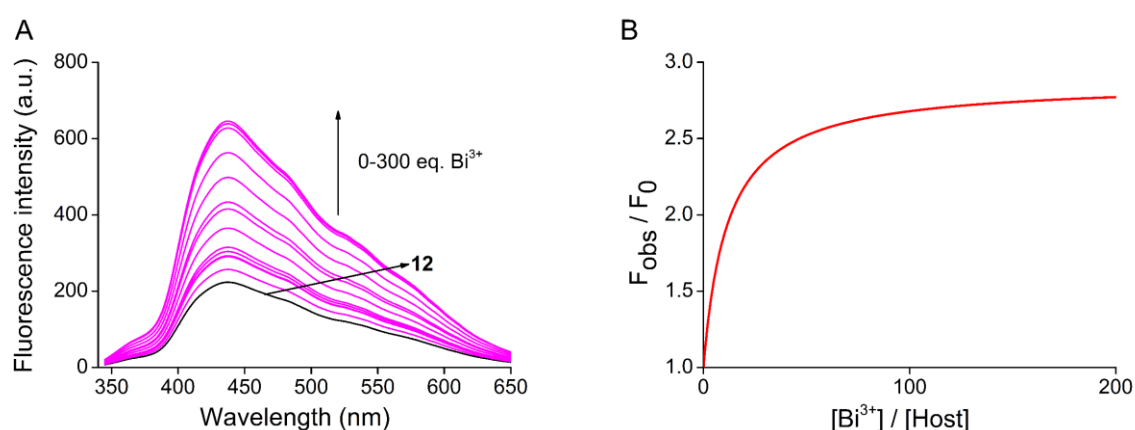

**Figure S7.** Series of fluorescence emission spectra for titration of macrocycle **12** with  $\text{Bi}^{3+}$  in acetonitrile (A) and the globally fitted nonlinear regression curve for determining  $\log K_a$  (B)

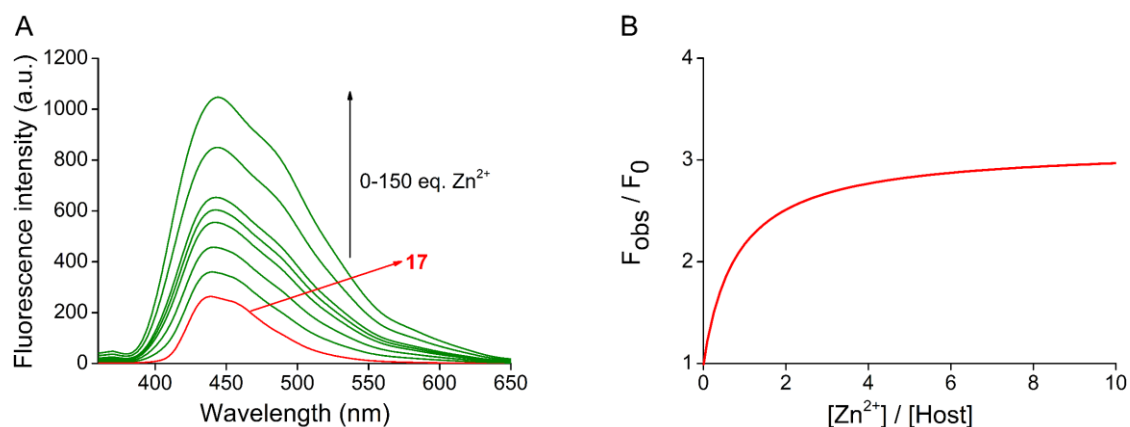

**Figure S8.** Series of fluorescence emission spectra for titration of macrocycle **17** with  $\text{Zn}^{2+}$  in acetonitrile (**A**) and the globally fitted nonlinear regression curve for determining  $\log K_a$  (**B**)

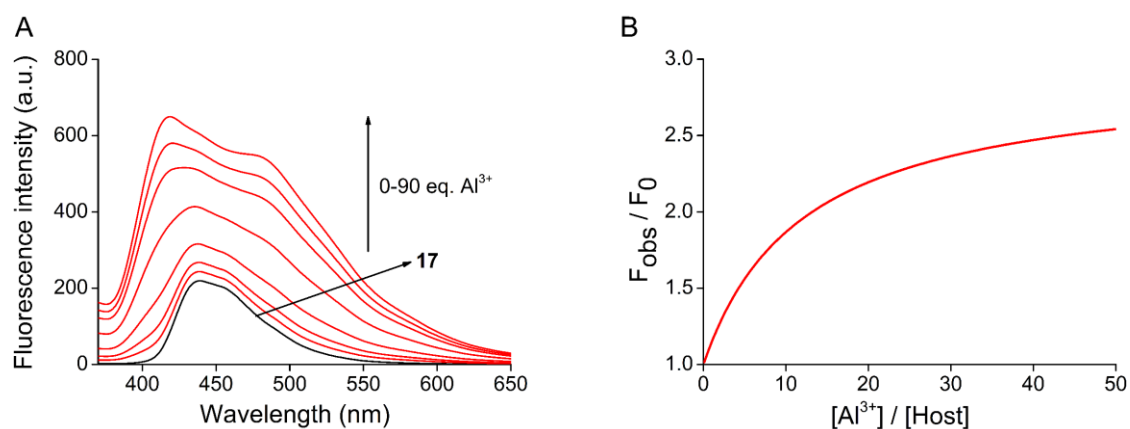

**Figure S9.** Series of fluorescence emission spectra for titration of macrocycle **17** with  $\text{Al}^{3+}$  in acetonitrile (**A**) and the globally fitted nonlinear regression curve for determining  $\log K_a$  (**B**)

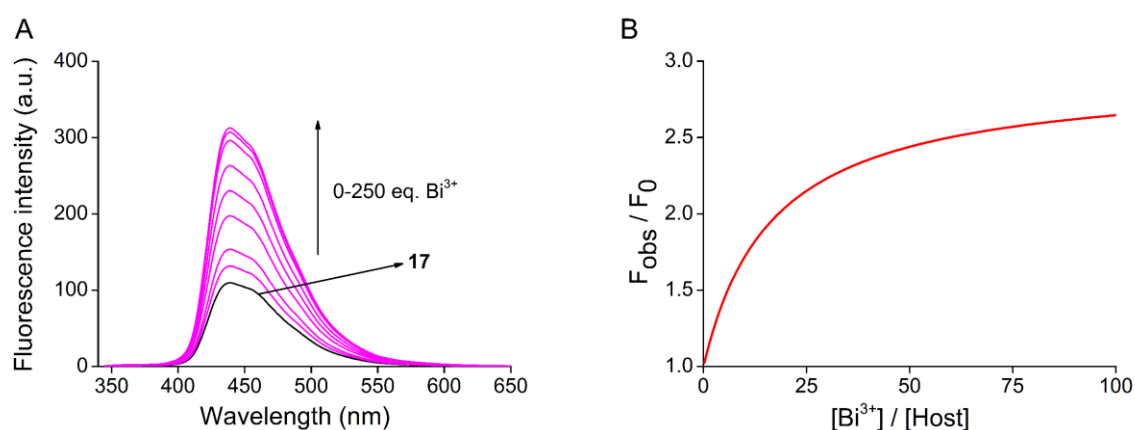

**Figure S10.** Series of fluorescence emission spectra for titration of macrocycle **17** with  $\text{Bi}^{3+}$  in acetonitrile (**A**) and the globally fitted nonlinear regression curve for determining  $\log K_a$  (**B**)

**3.  $^1\text{H}$ -NMR and  $^{13}\text{C}$ -NMR spectra of the new compounds (solvent:  $\text{CDCl}_3$  unless otherwise noted)**

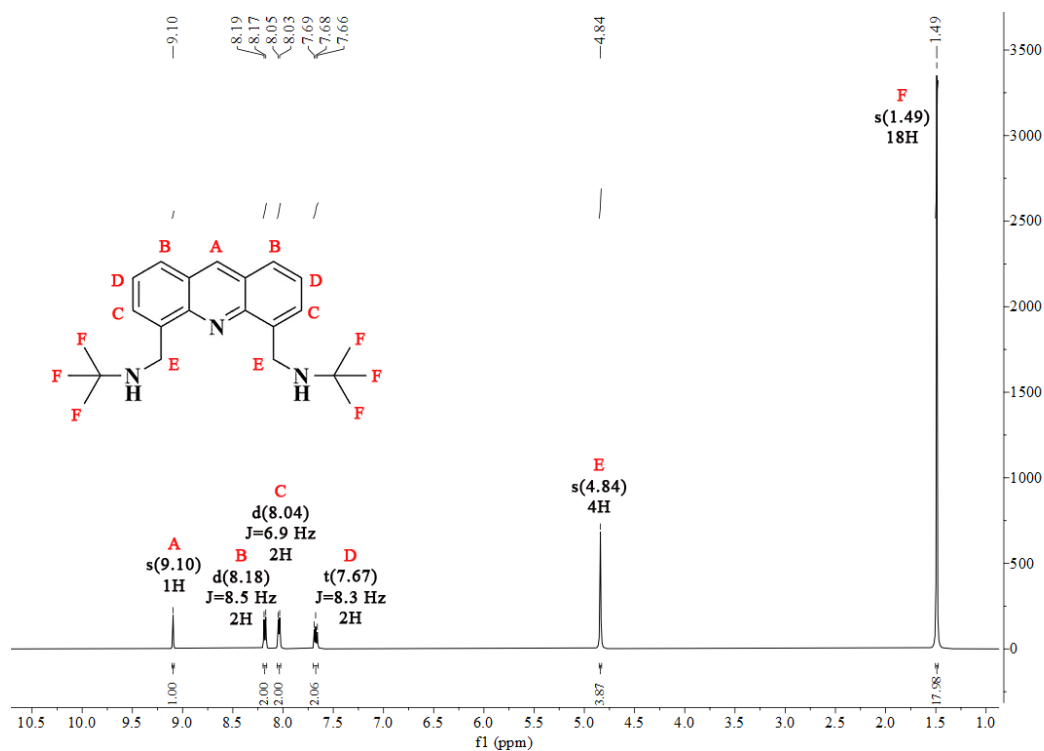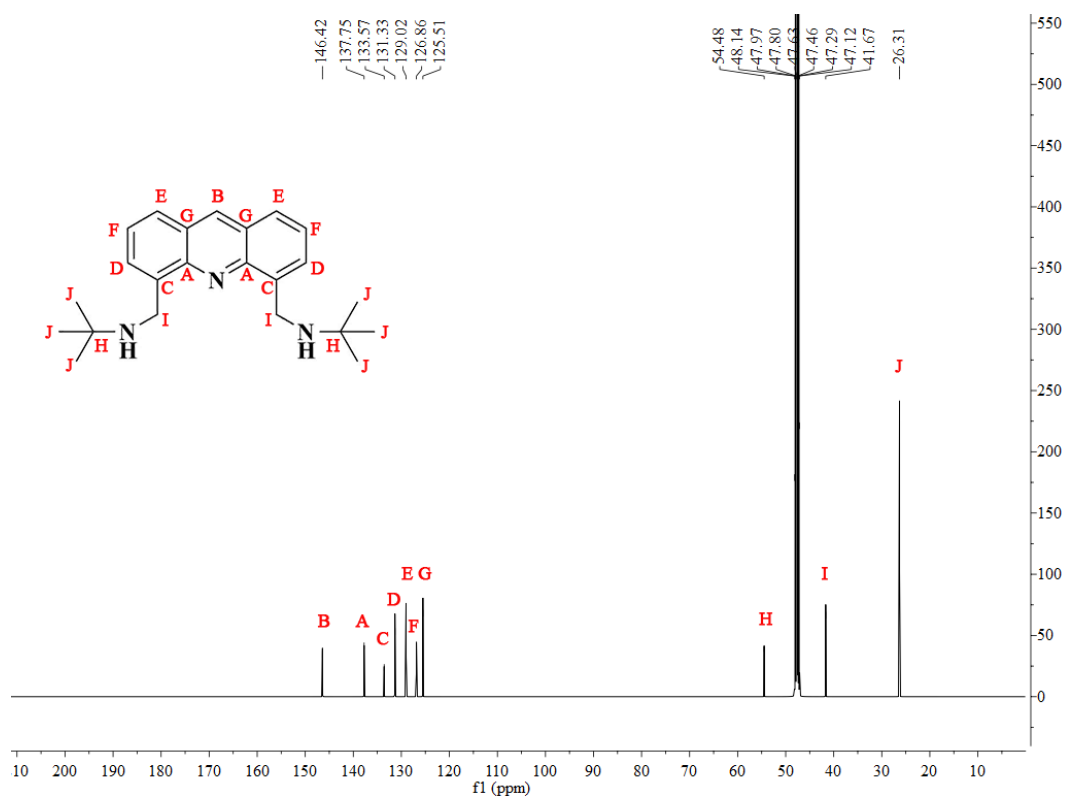

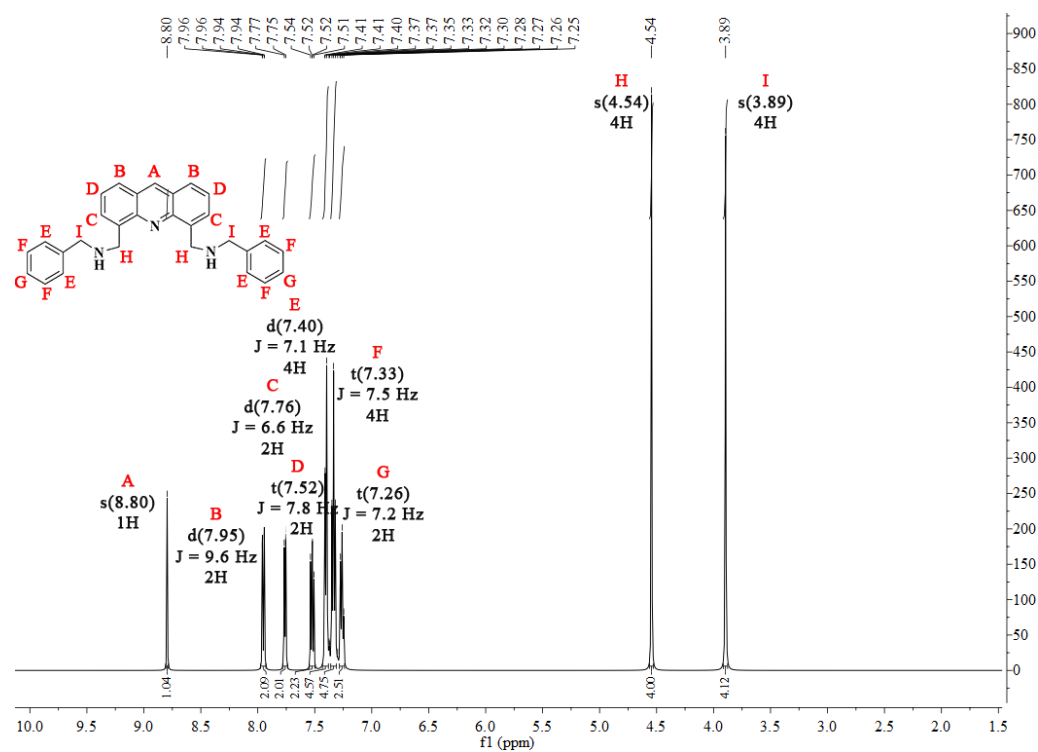

**Figure S13. <sup>1</sup>H-NMR spectrum of compound 11**

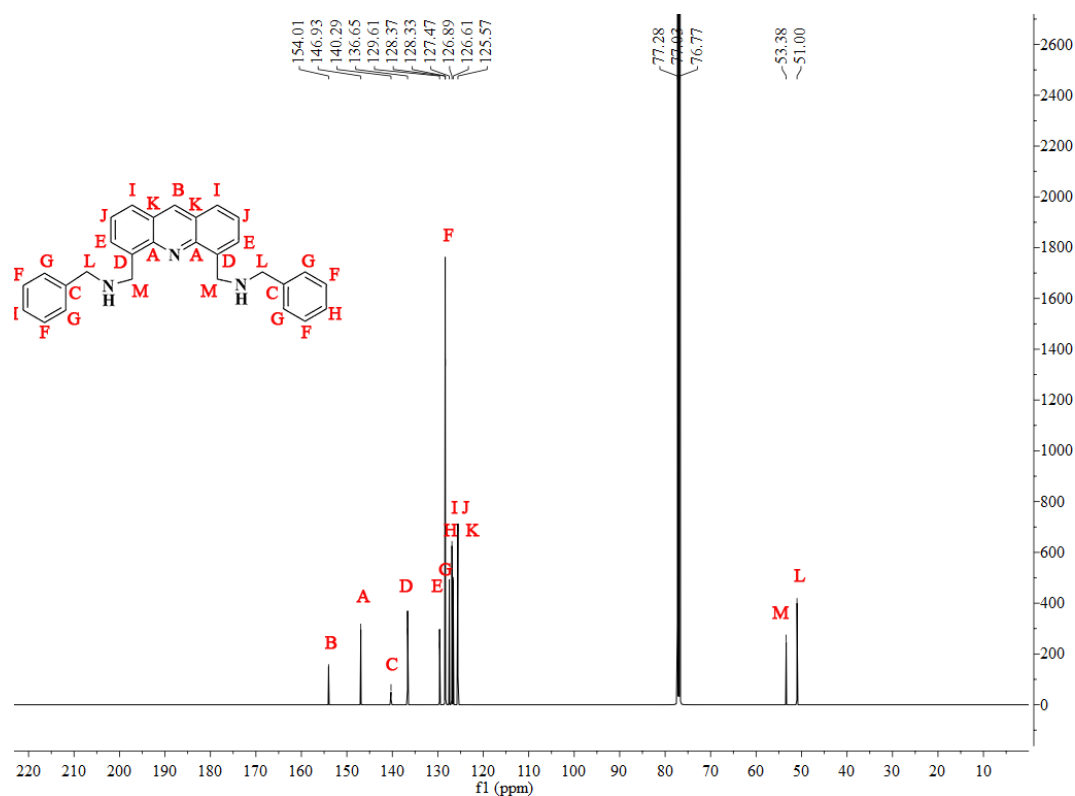

**Figure S14. <sup>13</sup>C-NMR spectrum of compound 11**

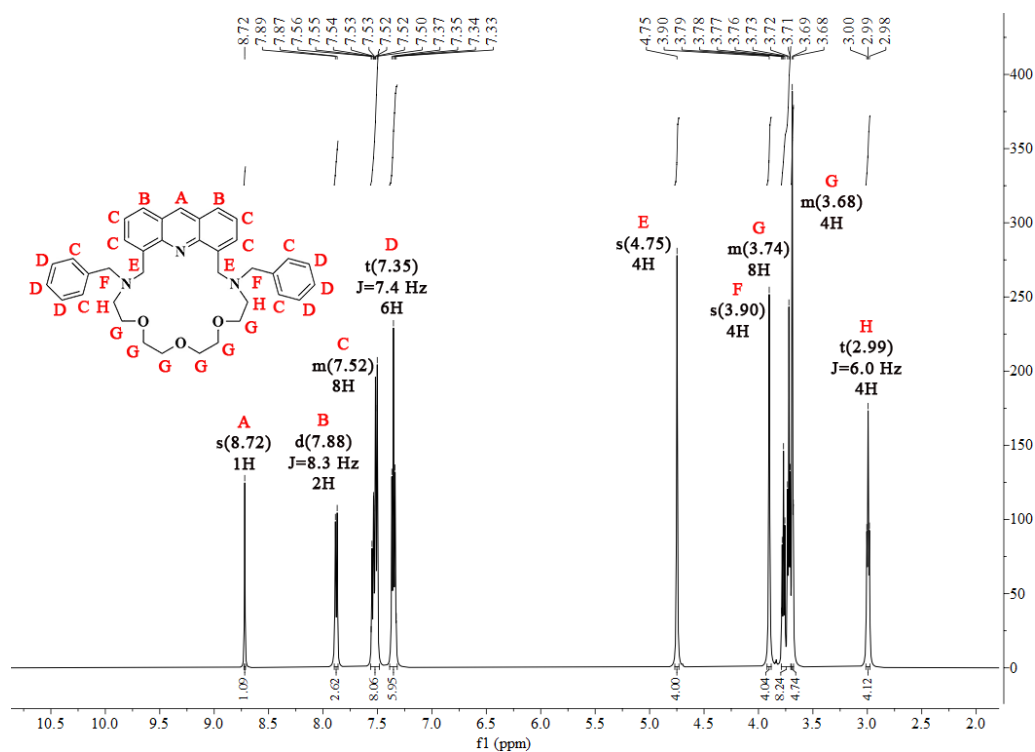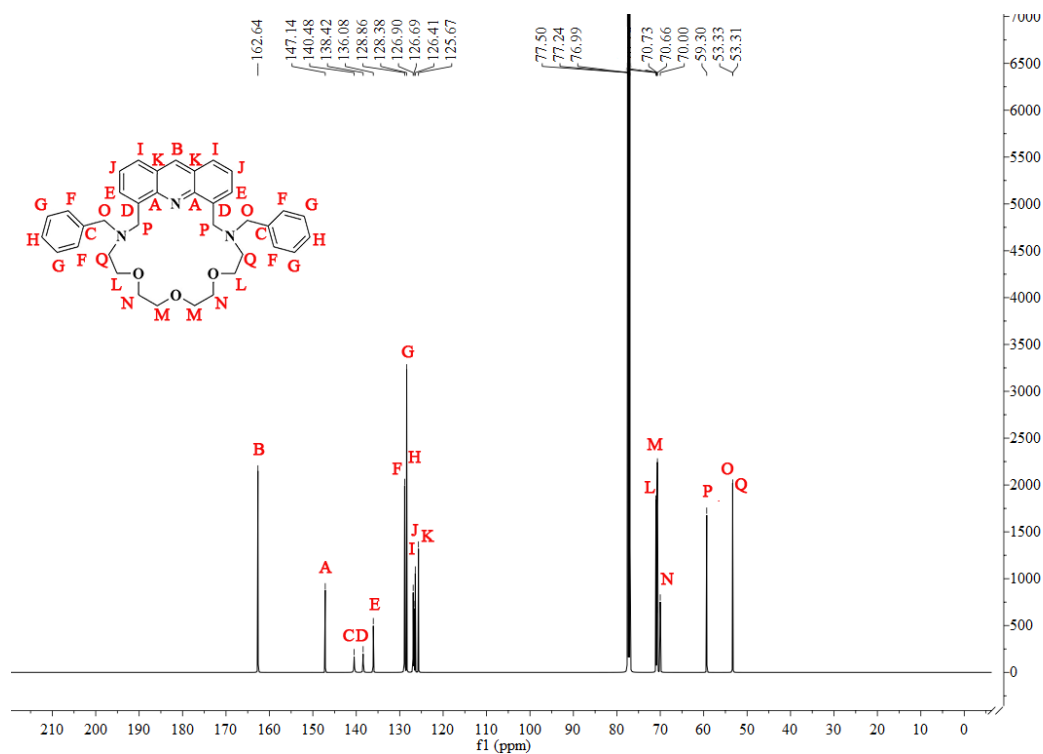



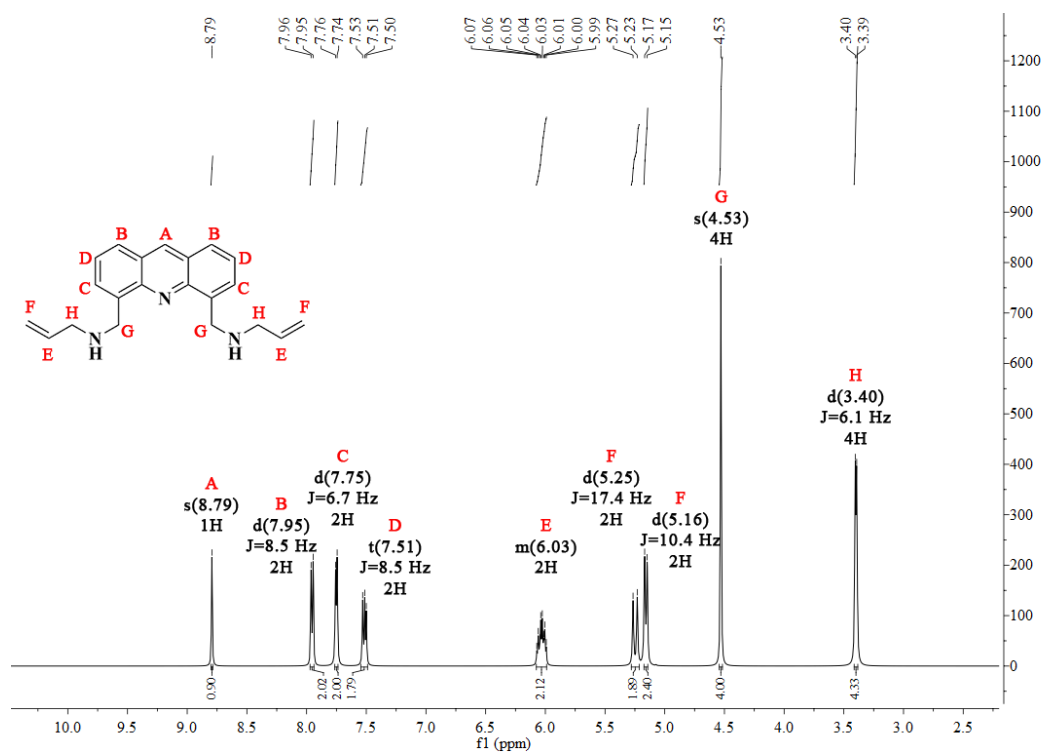

**Figure S17.** <sup>1</sup>H-NMR spectrum of compound **14**

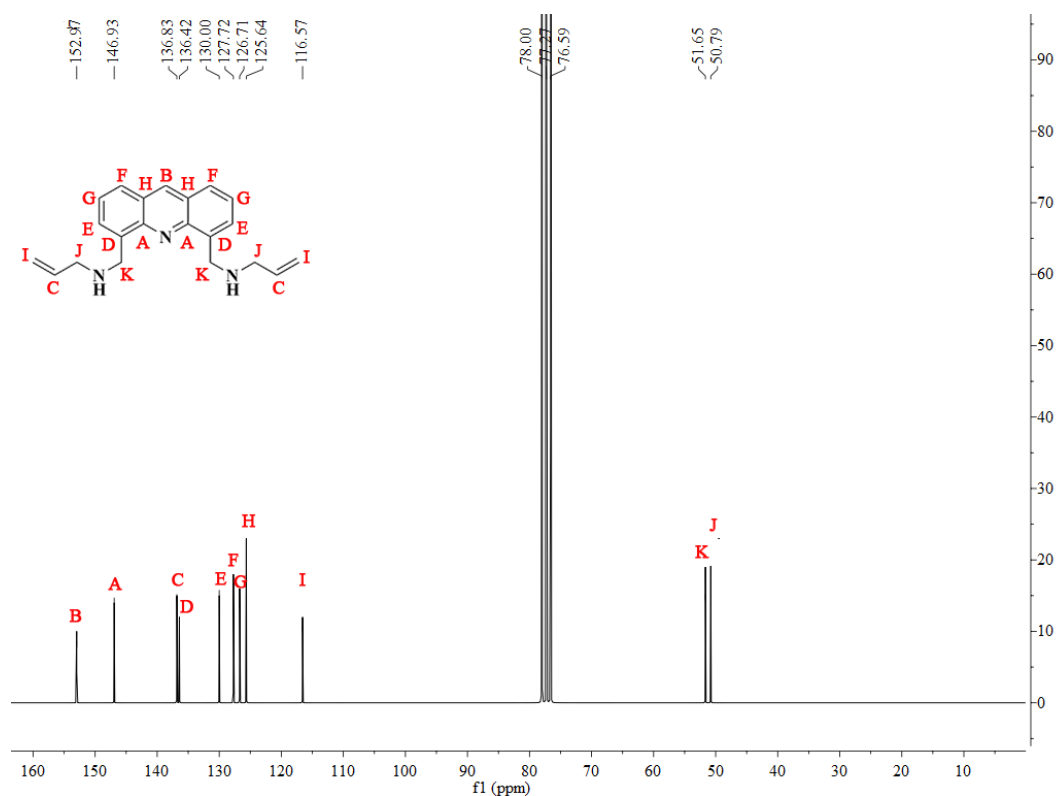

**Figure S18.** <sup>13</sup>C-NMR spectrum of compound **14**

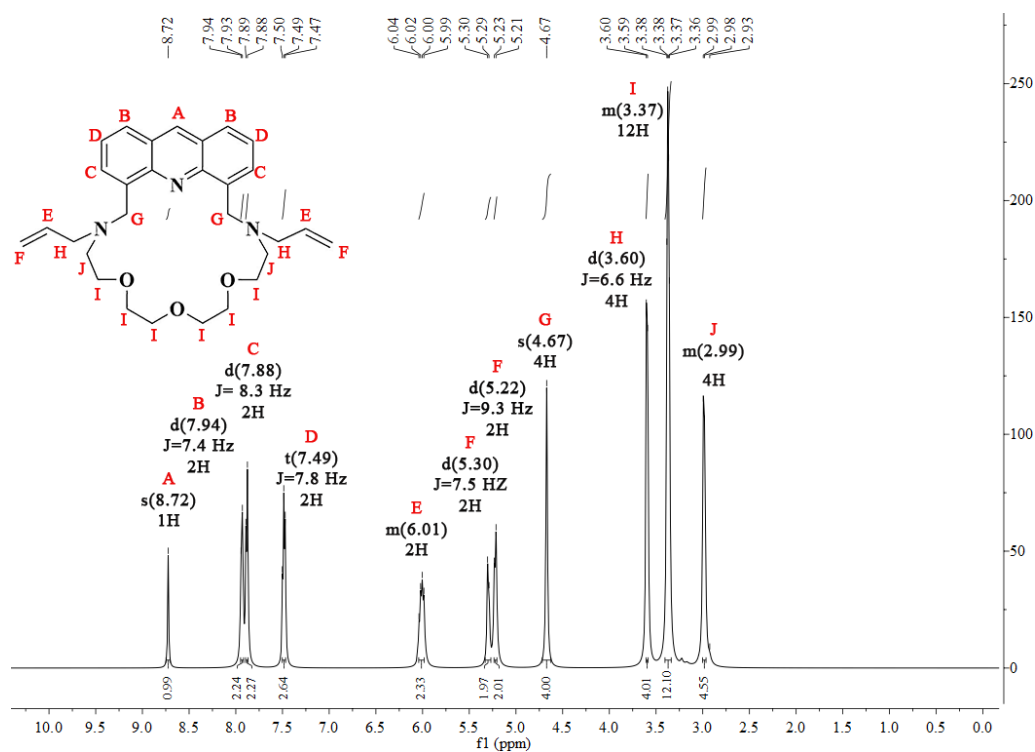

**Figure S19.**  $^1\text{H}$ -NMR spectrum of compound **15**

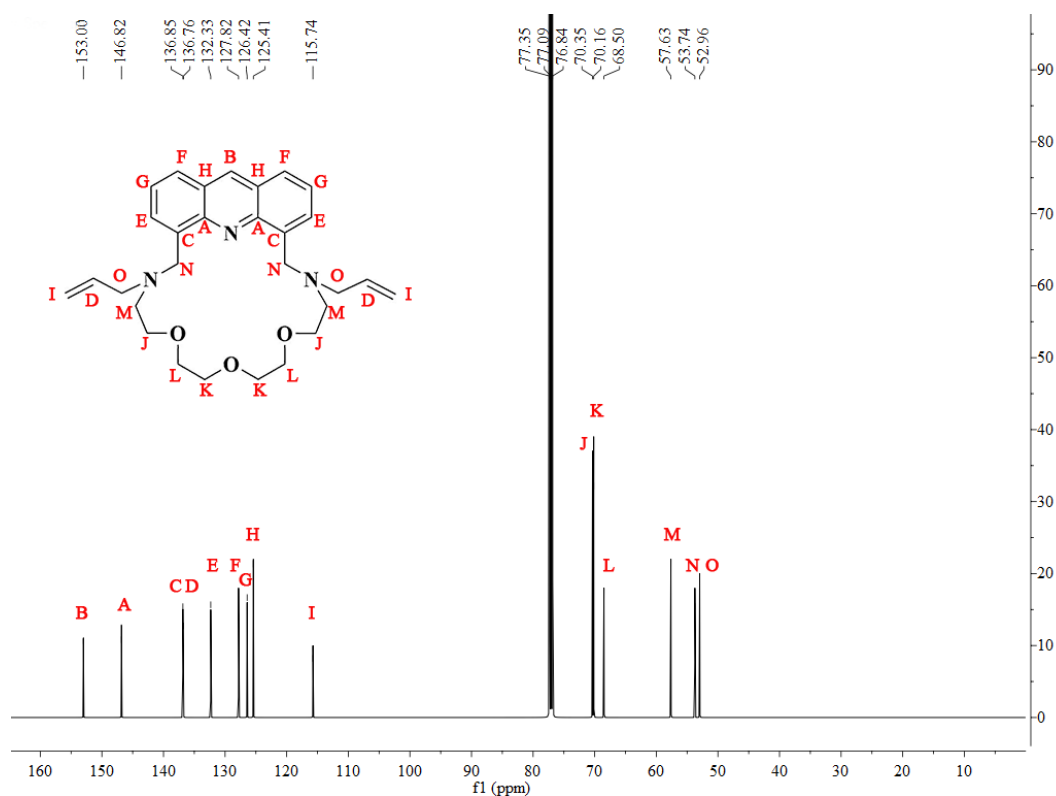

**Figure S20.**  $^{13}\text{C}$ -NMR spectrum of compound **15**

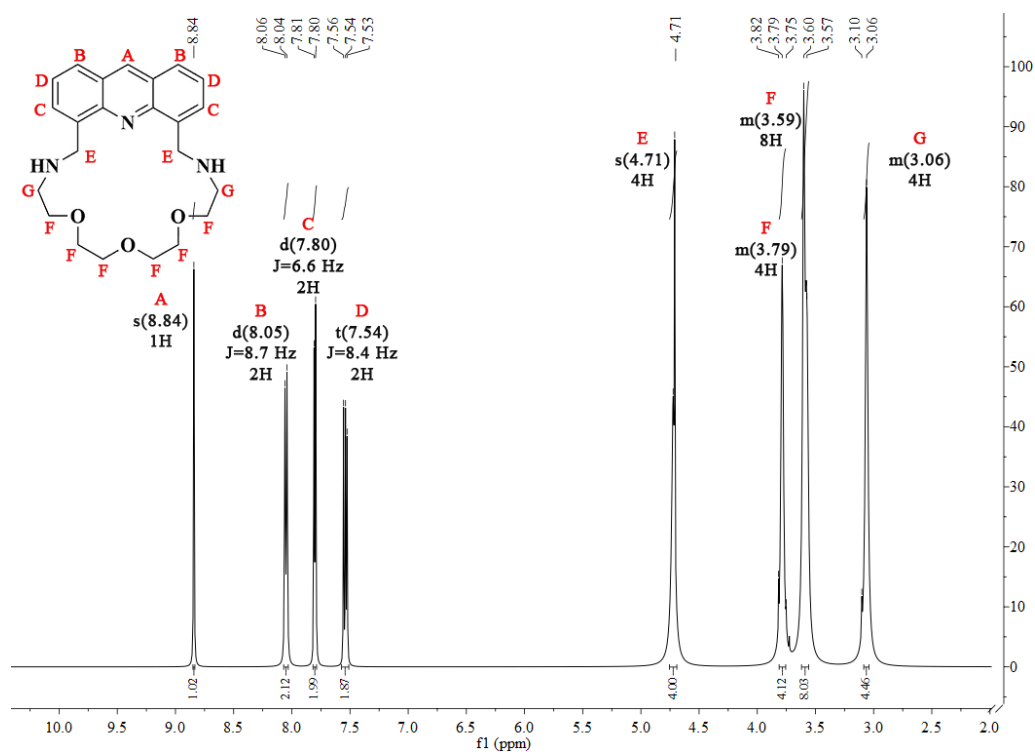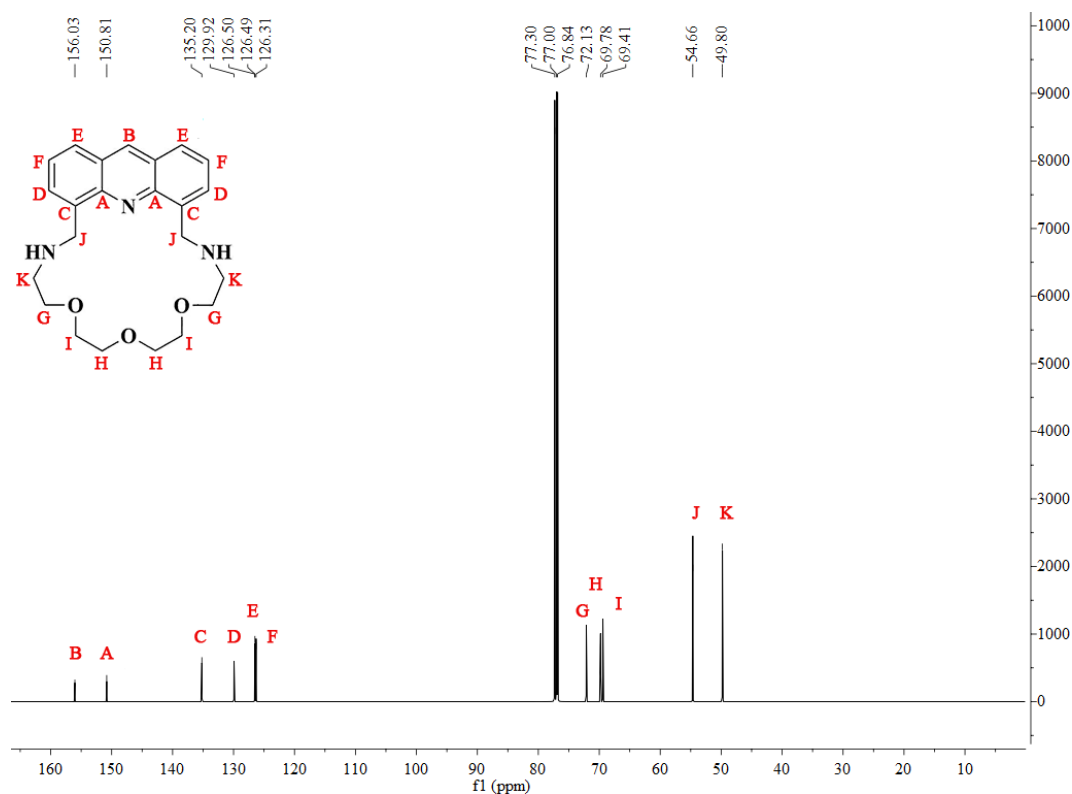

Supplement: s1 [file s1]
